# Supplementary material for: Effects of nanoparticle-mediated delivery of pitavastatin on atherosclerotic plaques in ApoE-knockout mice and THP-1-derived macrophages
Source: PubMed Central journal article supplement — Exp Ther Med. 2020 Apr 1;19(6):3787–97. doi: 10.3892/etm.2020.8632 (PMC7185072; doi:10.3892/etm.2020.8632), 2020-04-01

Figure S1. The surface receptor expression of CD11b in the THP-1-derived macrophages differentiated with 100 ng/ml PMA. (A) THP-1 cells stained using anti-CD11b antibodies were analyzed by flow cytometry. THP-1 cells were differentiated for two days (green) in the presence of PMA (100 ng/ml), and the undifferentiated THP-1 cells were used as the control group (black). (B) Quantification of MFI for CD11b. n=3. \*P<0.001. PMA, phorbol-12-myristate-13-acetate; MFI, mean fluorescence intensity.

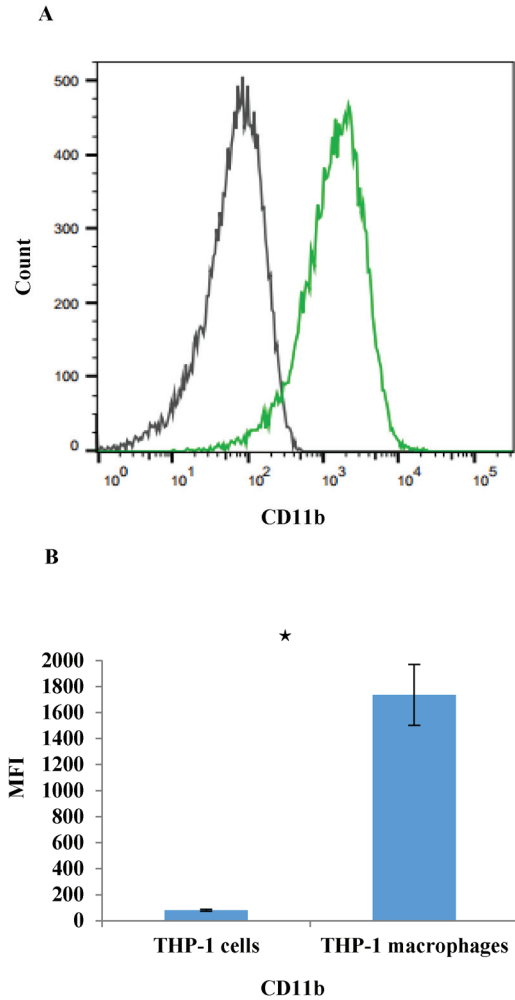

Supplement: Supplementary_Data.pdf [file Supplementary_Data.pdf]
